1 **Action-outcome knowledge dissociates from behavior in obsessive-compulsive**  
2 **disorder following contingency degradation**

3 Matilde M. Vaghi <sup>1,2</sup>, Rudolf N. Cardinal <sup>2,3,4</sup>, Annemieke M. Apergis-Schoute <sup>2,3</sup>, Naomi A.  
4 Fineberg <sup>5</sup>, Akeem Sule <sup>6</sup>, Trevor W. Robbins <sup>1,2</sup>

5

6 <sup>1</sup> Department of Psychology, University of Cambridge, Cambridge, CB2 3EB, UK

7 <sup>2</sup> Behavioural and Clinical Neuroscience Institute (BCNI), University of Cambridge,  
8 Cambridge, CB2 3EB, UK

9 <sup>3</sup> Department of Psychiatry, University of Cambridge, Cambridge, CB2 0SZ, UK

10 <sup>4</sup> Liaison Psychiatry Service, Cambridgeshire and Peterborough NHS Foundation Trust, Box  
11 190, Cambridge Biomedical Campus, Cambridge, CB2 0QQ, UK

12 <sup>5</sup> Hertfordshire Partnership University NHS Foundation Trust and University of Hertfordshire,  
13 Hertfordshire, AL10 8YE, UK

14 <sup>6</sup> Cumbria Partnership NHS Foundation Trust, NHS, Penrith, Cumbria, CA11 7QQ, UK

15

16 *Corresponding Author:* Dr. Matilde M. Vaghi, Department of Psychology and Behavioural  
17 and Clinical Neuroscience Institute, University of Cambridge, Downing St., Cambridge, CB2  
18 3EB, United Kingdom; Tel: + 44 (0) 1223 330 272; Email: [matilde.vaghi@gmail.com](mailto:matilde.vaghi@gmail.com) (e-mail).

19

20 *Keywords:* Obsessive-compulsive disorder; habit; goal-directed; action-outcome; learning;  
21 frontostriatal

22

23

24

25

26

27

28

29 **ABSTRACT (150/150)**

30 Goal-directed and habitual systems orchestrate action control. In disorders of compulsivity,  
31 their interplay seems disrupted and actions persist despite being inappropriate and without  
32 relationship to the overall goal. We manipulated action–outcome contingency to test whether  
33 actions are goal-directed or habitual in obsessive-compulsive disorder (OCD), the  
34 prototypical disorder of compulsivity, in which prominent theories have suggested that  
35 dysfunctional beliefs underlie the necessity for compulsive actions.

36 OCD patients responded more than controls when an action was causally less related to  
37 obtaining an outcome, indicating excessive habitual responding. Patients showed intact  
38 explicit action–outcome knowledge but this was not translated normally into behavior; the  
39 relationship between causality judgment and responding was blunted. OCD patients' actions  
40 were dissociated from explicit action-outcome knowledge, providing experimental support for  
41 the ego-dystonic nature of OCD and suggesting that habitual action is not sustained by  
42 dysfunctional belief.

43

44

45

46

47

48

49

50

51

52

53

54

55

56

## 57 INTRODUCTION

58 Action is controlled by different learning mechanisms. On the one hand, actions followed by  
59 a reinforcer are more likely to be repeated in the future in a habitual fashion as a  
60 consequence of strengthening a stimulus-response representation. On the other hand,  
61 animals do not merely repeat previously reinforced actions but can instead make deliberate,  
62 goal-directed choices based on their knowledge of the relationship between an action and  
63 the associated outcome and their motivation to obtain that outcome [1]. As such,  
64 independent neural systems underlying goal-directed and habitual behavior orchestrate  
65 action control and such a delicate balance is essential for adaptive everyday behavior.

66 Imbalance of the goal-directed and the habitual system has been hypothesized to be  
67 relevant for understanding compulsive behaviors [2] which manifest as actions persistently  
68 repeated without relationship to the overall goal [3]. Compulsions are also characterized by  
69 the feeling of being compelled or forced to engage in such behaviors [4] and they are  
70 generally associated with the insight that such actions are ultimately harmful and  
71 purposeless. Therefore, compulsive behaviors might be rooted in a disrupted synergy  
72 between the goal-directed and the habitual system whereby the habitual system seemingly  
73 overtakes response control and actions are divorced from their goals [2]. Obsessive-  
74 compulsive disorder (OCD) can be regarded as the prototypical disorder of compulsivity,  
75 which we used here as a benchmark to test this hypothesis. OCD manifests clinically as a  
76 lack of goal-directed control over repetitive, ritualistic actions and intrusive thoughts. OCD is  
77 ego-dystonic in nature as patients are generally able to recognize their compulsive behaviors  
78 and thoughts as disproportionate, excessive, and maladaptive [5]. Often, it is this  
79 'disconnection' between the responses OCD patients find themselves making, as opposed to  
80 the responses they know to be rational, that causes so much distress [6].

81 Traditionally, cognitive theories posited dysfunctional beliefs as a major driver of OCD  
82 symptoms, to which cognitive treatments are targeted [7,8]. More recently, however,  
83 experimental evidence showing a tendency for OCD patients to display habitual behavior at  
84 the expense of goal-directed actions [9–11] has suggested that OCD is a disorder of habitual

85 control. Such imbalance between hypothetical goal-directed and stimulus-response (S-R)  
86 habitual control over behavior has been shown by using the experimental manipulation of  
87 instructed outcome devaluation, i.e. changes in the *value* of the outcome previously  
88 associated with the action, as an experimental manipulation for detecting habit-based  
89 control. Excessive habits were thus expressed as an irrelevant maintenance of behavior,  
90 manifested as a lack of sensitivity to such a manipulation [9–11].

91 However, learning theory has established that goal-directed agents are also sensitive to the  
92 *causal* relation (i.e. contingency) between the response and the reward: if instrumental  
93 responding continues when such contingencies are degraded, it is assumed to be under  
94 habitual (S–R) control [1]. This manipulation of contingency-based instrumental responding  
95 has been tested across species and found to be mediated by fronto-striatal neural circuitry  
96 [12–20] implicated in OCD [21] and other disorders of compulsivity such as drug addiction  
97 [22] and binge-eating disorder [23]. As the causal action-outcome association is diminished,  
98 a reduction in behavioral responding is usually observed and, in humans, lower estimates of  
99 causal influence on the occurrence of the outcome are reported verbally via explicit causal  
100 judgments. Here, we developed a novel behavioral paradigm based on contingency  
101 degradation [1,16] to test the robustness of causal associations between actions and  
102 outcomes in OCD.

103 Importantly, with this experimental manipulation, we measured not only the rate of  
104 behavioral adjustment following changes in the causal action-outcome relationship, but also  
105 how subjects perceived that causal relationship. Therefore, we were able to test whether  
106 patients with OCD, compared to healthy volunteers, (i) showed goal-directed control by  
107 modulating their behavior in response to contingency degradation; (ii) accurately reported  
108 action-outcome knowledge of the causal relationship between response and associated  
109 reward; and crucially, (iii) differentially used action–outcome knowledge to guide their  
110 behavior. Therefore, our experimental manipulation enabled the testing of two competing  
111 hypotheses.

112 Compulsive behaviors (e.g. checking or rituals to prevent harm) may be interpreted as  
113 attempts to establish control. In this respect, compulsions might result either from an  
114 increased sense of responsibility [7] or, in contrast, as superstitious behaviors carried out  
115 either to regain a subjective sense of control or because contingencies are misperceived  
116 [24–26]. However, patients with OCD generally recognize their behavior as irrational, and  
117 hence exhibit a dichotomy between their behavior and their beliefs about the effectiveness of  
118 their actions. Therefore, a correspondence between inflated (or deflated) perceived  
119 contingencies and behavior would argue in favor of cognitive accounts for OCD, whereby  
120 compulsive behavior is guided by erroneous cognitive interpretation of environmental cues.  
121 In contrast, accurate detection of action–outcome contingencies in the face of behavioral  
122 insensitivity to contingency manipulation would provide support for a dissociation between  
123 an accurate cognitive appraisal of the environment and a failure to use this knowledge to  
124 guide behavior. The ego-dystonic nature of OCD, whereby the urge to perform an action is  
125 associated with the knowledge that the action is excessive or irrelevant would resonate with  
126 the latter scenario. Here, we test this prediction and show it to be valid. In addition, by using  
127 the contingency degradation intervention and avoiding verbally instructed devaluation  
128 procedures [9,11] it will be more feasible to make translational comparisons across species  
129 [17].

130

## 131 **RESULTS**

132 **Contingency degradation.** We used the experimental manipulation of contingency  
133 degradation to study detection of action-outcome contingencies in a sample of 27 OCD  
134 patients and 27 matched controls (**Table S1** and **Material and Methods**). Throughout the  
135 experimental session, the standard measure of contingency,  $\Delta P$ , indexed the relationship  
136 between performing an action and obtaining an outcome.  $\Delta P$  was the difference between  
137 two conditional probabilities: the probability of receiving an outcome upon performance of an  
138 action [probability of outcome given the action,  $P(O|A)$ , i.e. the probability of response-  
139 contingent outcome] and the probability of receiving an outcome in the absence of that

140 action [probability of outcome given the absence of an action,  $P(O|\sim A)$ , i.e. the probability of  
 141 a non-contingent outcome], such that  $\Delta P = P(O|A) - P(O|\sim A)$  [27]. To degrade the contingency,  
 142 once agents have learned to perform an action to receive a reward with a certain probability,  
 143 a schedule of non-contingent outcome delivery is superimposed. By increasing the  
 144 frequency of non-contingent outcomes, the overall contingency (i.e. the causal association  
 145 between an action and its consequences) is degraded, hence reduced, or becomes  
 146 negative. If guided by the goal-directed system, an agent should stop responding in face of  
 147 contingency degradation (**Figure 1A-C**). Measures of interest include the overall relationship  
 148 between actual and perceived contingency, and between contingency and behavior, but also  
 149 specific contingency transitions in which  $P(O|\sim A)$  increases without changes to  $P(O|A)$ : this  
 150 manipulation degrades instrumental contingency without affecting the contiguity of actions  
 151 and outcomes that drives S-R habits, so is a specific test for excessive habitual responding.  
 152

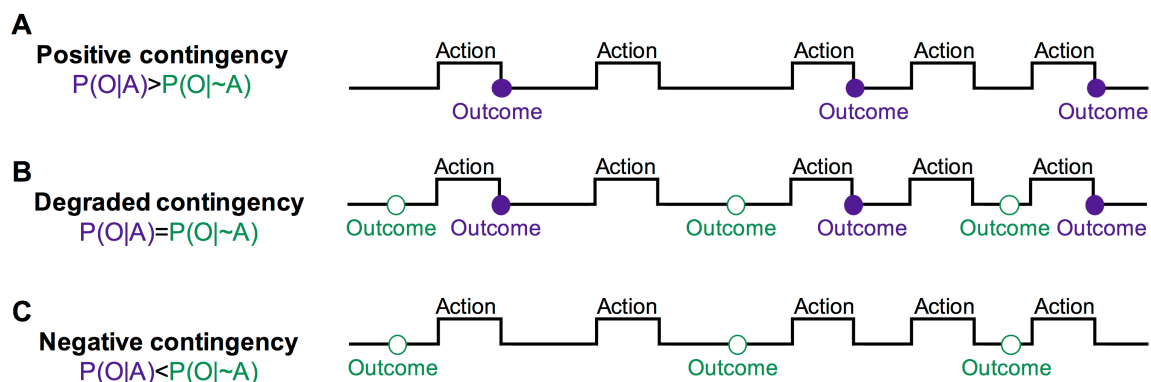

153

154 **Figure 1 Contingency manipulation.** (A) Diagram illustrating a schedule with a positive  
 155 contingency, in which outcome is delivered upon performance of an action with a given  
 156 probability  $P(O|A)$ . (B) Contingency is degraded by also delivering outcomes in the absence  
 157 of an action, with a given probability  $P(O|\sim A)$ . If the contingency is degraded to the extent  
 158 that the two probabilities are equal, the causal status of the action is nil and the probability of  
 159 the reinforcer is the same regardless of any response. (C) When the  $P(O|\sim A)$  is higher than  
 160  $P(O|A)$ , the contingency becomes negative and the action reduces the probability of  
 161 reinforcer delivery.  $P(O|A)$ , probability of outcome given the action, i.e. the probability of  
 162 receiving a response-contingent outcome;  $P(O|\sim A)$  probability of outcome given the absence  
 163 of an action, i.e. the probability of a non-contingent outcome. Violet, filled circle for  
 164 contingent outcomes; green, empty circle for non-contingent outcomes.  
 165

166 **A novel protocol to test sensitivity to action-outcome contingency.** We developed and  
 167 implemented a novel free-operant, self-paced procedure. The instructions informed the

168 participants that they could earn 25 pence (p; £0.25) whilst pressing the space bar on a  
 169 keyboard, and that they were free to press the key as often as they liked (**Figure 2 A** and  
 170 **Material and Methods**). They were further instructed that the relationship between pressing  
 171 the space bar and receiving the 25p reward would vary during the experiment, and that  
 172 pressing the space bar might earn a reward, a reward might also arrive on its own, or  
 173 pressing the space bar might prevent a reward from arriving. Lastly, they were informed that  
 174 occasionally they would be asked to rate the degree to which pressing the space bar caused  
 175 the occurrence of the reward. We varied  $P(O|A)$  and  $P(O|\sim A)$  to give blocks with different  
 176 levels of contingency and obtain different experimental conditions (**Figure 2 B, C** and **Table**  
 177 **1**). In positive contingency conditions,  $P(O|A)$  was higher than  $P(O|\sim A)$ . Those were  
 178 degraded by increasing  $P(O|\sim A)$ . To mimic the maladaptive nature of compulsivity in OCD,  
 179 by which actions are repeated despite adverse consequences, negative contingencies were  
 180 also introduced in the experimental paradigm whereby  $P(O|\sim A)$  was higher than  $P(O|A)$ . In  
 181 these situations, performing the action reduced the probability of getting an outcome.

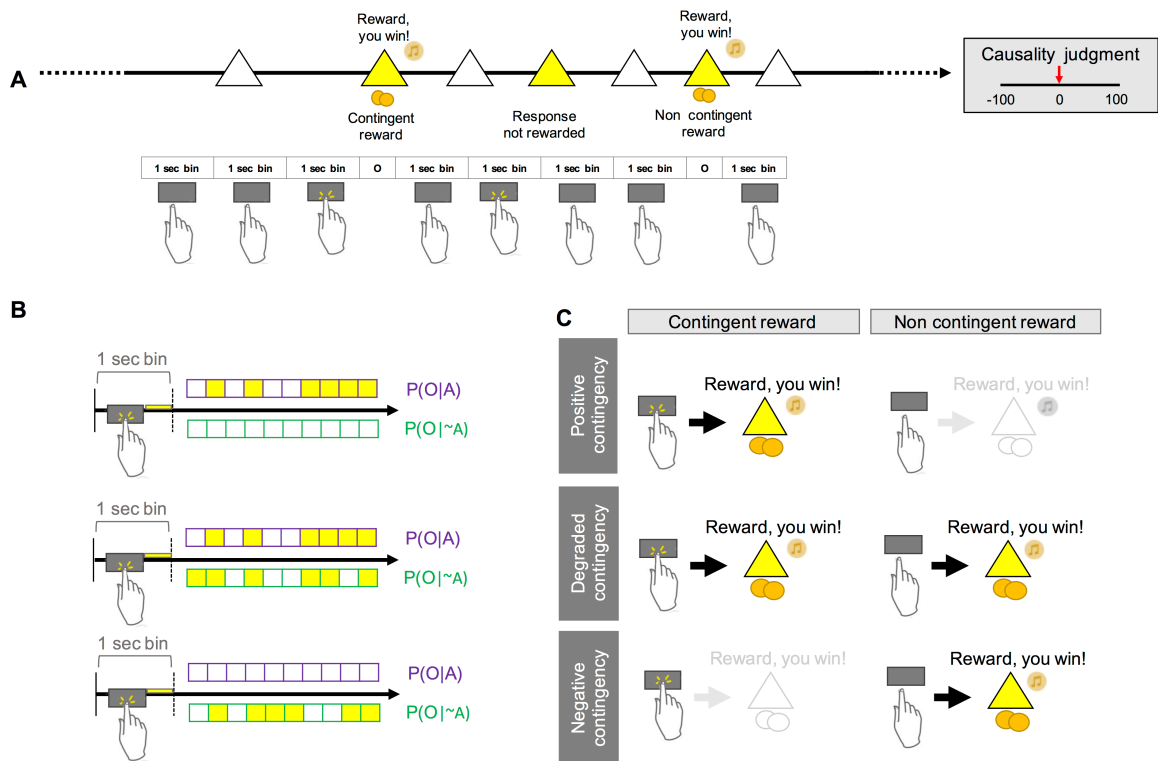

182

183 **Figure 2 Experimental paradigm. (A)** Subjects had to complete an experimental session of  
 184 12 blocks of 2 minutes each. At the end of each block, subjects had to judge to what extent

185 pressing the space bar caused the occurrence of the reward, on a scale from -100 (pressing  
 186 the space bar always prevented reward) to 100 (pressing the space bar always caused  
 187 reward). During the experimental session, the participant was presented with a white triangle  
 188 and could decide whether to press the space bar or not. Rewards were delivered  
 189 contingently upon pressing of the space bar or non-contingently in the absence of a  
 190 response. In addition, a running total of the amount of money earned within a block was  
 191 continuously displayed in the upper corner of the screen (not shown in figure). Note that in  
 192 cases where the participant was not pressing the space bar for multiple (hidden) 1 sec bins  
 193 in a row, the white triangle was continuously displayed on the screen, unless a non-response  
 194 contingent reward occurred. In those cases, a reward was displayed on the screen non-  
 195 contingently. **(B)** Each block was divided into 120 unsignaled time periods (bins) of 1  
 196 second. When a response occurred within each bin, the triangle turned yellow until the bin  
 197 ended. If a response was recorded during the bin, a contingent reward was delivered at the  
 198 end of that bin according to the applicable probability of outcome delivery given a response,  
 199  $P(O|A)$ . If no response occurred during the bin, a non-contingent reward was delivered  
 200 according to the applicable probability of outcome delivery given the absence of a response,  
 201  $P(O|\sim A)$ . **(C)** By varying  $P(O|A)$  and  $P(O|\sim A)$ , different levels of contingencies were achieved  
 202 so that each experimental session included positive, degraded, and negative contingency  
 203 blocks.  $P(O|A)$ , probability of outcome given the action, i.e. probability of receiving a  
 204 response-contingent outcome;  $P(O|\sim A)$  probability of outcome given the absence of an  
 205 action, i.e. probability of a non-contingent outcome.  
 206

207 **Table 1 Response rates and causality judgments**

| Block                             | Programmed contingency |               |            | Experienced contingency |       | Response rate |                | Causality judgment |                   |                   |
|-----------------------------------|------------------------|---------------|------------|-------------------------|-------|---------------|----------------|--------------------|-------------------|-------------------|
|                                   | $P(O A)$               | $P(O \sim A)$ | $\Delta P$ | CTL                     | OCD   | CTL           | OCD            | CTL                | OCD               |                   |
| Fixed Order                       | 1                      | 0.60          | 0.00       | 0.60                    | 0.59  | 0.60          | 0.51<br>(0.21) | 0.49<br>(0.24)     | 43.30<br>(34.27)  | 48.60<br>(31.82)  |
|                                   | 2                      | 0.60          | 0.60       | 0.00                    | 0.01  | 0.05          | 0.26<br>(0.20) | 0.35<br>(0.27)     | 8.17<br>(27.64)   | 10.67<br>(44.74)  |
|                                   | 3                      | 0.00          | 0.00       | 0.00                    | 0.00  | 0.00          | 0.37<br>(0.27) | 0.48<br>(0.27)     | -10.46<br>(39.75) | -14.81<br>(45.60) |
| Shuffled in a Latin square design | 4                      | 0.00          | 0.00       | 0.00                    | 0.00  | 0.00          | 0.38<br>(0.23) | 0.48<br>(0.27)     | -15.17<br>(36.06) | -21.35<br>(40.43) |
|                                   | 5                      | 0.00          | 0.30       | -0.30                   | -0.29 | -0.30         | 0.26<br>(0.21) | 0.27<br>(0.21)     | -50.43<br>(47.60) | -41.51<br>(55.30) |
|                                   | 6                      | 0.00          | 0.60       | -0.60                   | -0.62 | -0.60         | 0.20<br>(0.23) | 0.21<br>(0.16)     | -55.27<br>(44.83) | -32.53<br>(66.08) |
|                                   | 7                      | 0.30          | 0.00       | 0.30                    | 0.30  | 0.30          | 0.49<br>(0.22) | 0.62<br>(0.20)     | 27.54<br>(24.20)  | 35.34<br>(25.33)  |
|                                   | 8                      | 0.30          | 0.30       | 0.00                    | 0.03  | 0.00          | 0.34<br>(0.26) | 0.41<br>(0.24)     | 0.01<br>(31.53)   | 0.36<br>(37.34)   |
|                                   | 9                      | 0.30          | 0.60       | -0.30                   | -0.28 | -0.29         | 0.29<br>(0.26) | 0.32<br>(0.26)     | -12.95<br>(47.98) | -9.40<br>(38.56)  |
|                                   | 10                     | 0.60          | 0.00       | 0.60                    | 0.60  | 0.60          | 0.62<br>(0.21) | 0.56<br>(0.23)     | 56.01<br>(26.67)  | 53.52<br>(30.84)  |
|                                   | 11                     | 0.60          | 0.30       | 0.30                    | 0.32  | 0.31          | 0.38<br>(0.26) | 0.53<br>(0.25)     | 22.49<br>(30.71)  | 33.06<br>(32.79)  |
|                                   | 12                     | 0.60          | 0.60       | 0.00                    | -0.01 | 0.00          | 0.29<br>(0.23) | 0.38<br>(0.25)     | 9.64<br>(31.81)   | 8.30<br>(36.75)   |

208  $P(O|A)$ , probability of the outcome given the action;  $P(O|\sim A)$ , probability of the outcome in  
 209 the absence of the action;  $\Delta P$ =contingency. Dependent variables are given as mean (SD).



210 Blocks 1-3 were presented in a fixed order; Block 4 -12 were presented according to a Latin  
211 square design. Programmed contingency refers to the a priori experimentally programmed  
212 contingency, resulting from the a priori programmed conditional probabilities. Experienced  
213 contingency where computed for each subject and then averaged within group. Experienced  
214 contingency closely matched the programmed contingency.

215  
216

217 **Effect of instrumental contingency on response rate.** In line with previous data in healthy  
218 volunteers, mean response rate increased with contingency (contingency,  $F_{4,208}=65.028$ ,  
219  $p<0.001$ ) (**Table 1** and **Figure 3A**). Overall levels of responding did not differ between the  
220 groups (group,  $F_{1,52}=1.074$ ,  $p=0.305$ ), ruling out apathy or, in contrast, generalized  
221 impulsivity, in the OCD group. Responding in the groups was differentially affected by the  
222 contingency (group $\times$ contingency,  $F_{4,208}=3.922$ ,  $p=0.01$ ); this difference was explored via  
223 between-groups simple-effect comparisons at each level of contingency. Patients with OCD  
224 persisted in responding more than healthy subjects in the face of reduced instrumental  
225 contingency (group  $\Delta P=0.3$ ,  $F_{1,52}=6.036$ ,  $p=0.017$ ) (specific transitions in which  $P(O|\sim A)$   
226 increased without changing  $P(O|A)$  are explored further below). Increased response rates in  
227 patients did not correlate with impulsivity traits, measured by the Barratt Impulsiveness Scale  
228 [28] ( $r=0.312$ ,  $p=0.129$ ). Patients responded marginally more at  $\Delta P=0.0$ , but this did not  
229 reach significance ( $F_{1,52}=3.185$ ,  $p=0.080$ ).

230 The group difference in the effect of contingency remained significant even when  
231 considering only medicated OCD and controls (group  $_{\text{OCD medicated, Controls}} \times$ contingency,  
232  $F_{4,176}=4.107$ ,  $p=0.003$ ) or only unmedicated OCD and controls (group  $_{\text{OCD unmedicated, Controls}}$   
233  $\times$ contingency,  $F_{4,132}=2.628$ ,  $p=0.037$ ). There were no between-group effects nor interactions  
234 that depended on medication status in OCD patients (all  $p > 0.1$ ) (**Figure S1**).

235 We recorded the number of presses made within each 1-s time bin and did not detect a  
236 difference between groups in the number of additional number of responses within each bin  
237 (those beyond the first such response, which had behavioural effects). 'Additional'  
238 (superfluous) responding was not affected by instrumental contingency (contingency,  
239  $F_{4,208}=0.621$ ,  $p=0.648$ ) or group (group,  $F_{1,52}=0.017$ ,  $p=0.896$ ; group $\times$ contingency,  
240  $F_{4,208}=0.070$ ,  $p=0.991$ ). Differences in the additional number of responses within each bin

241 would have been consistent with a framework in which excessive responding in OCD is  
 242 attributed to a failure of inhibition. Our findings instead reinforce the notion that OCD patients  
 243 expressed habitual responding, a hypothesis we test directly below.  
 244

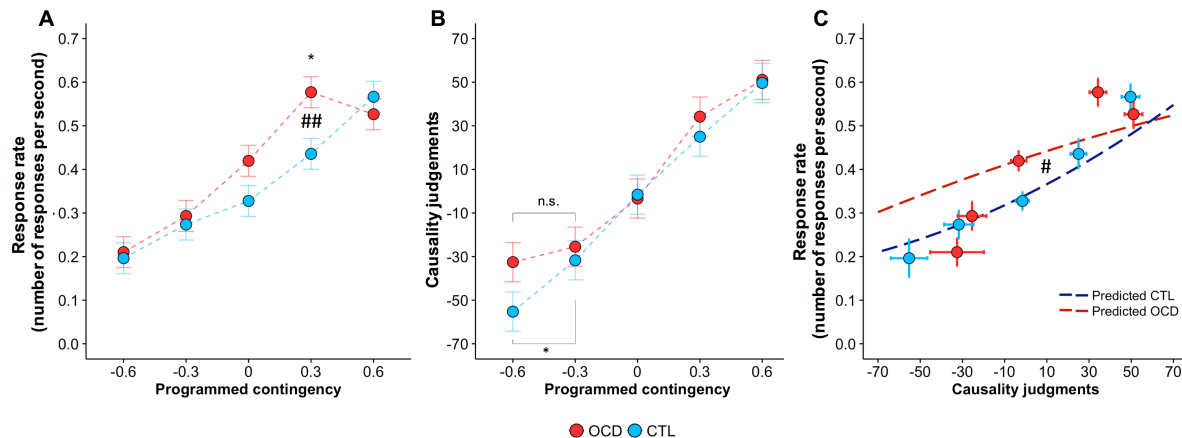

245

246 **Figure 3 Increased response rate but intact action-outcome knowledge and their**  
 247 **dissociation in OCD. (A)** Mean response rate by contingency. Both groups responded  
 248 more for higher contingencies. However, OCD patients showed reduced sensitivity to  
 249 instrumental contingency. ##p<0.01, interaction; \*p<0.05, for between-group comparison.  
 250 **(B)** Subjective judgments of causality increased as a direct function of response–outcome  
 251 contingency in both groups. Data are presented in ascending order of programmed  
 252 contingency, but contingencies were experienced by each subject in a semi-randomized  
 253 order. Error bar indicates Fisher's Least Significant Difference (FLSD) to facilitate post-hoc  
 254 comparisons (error bars are  $\pm 0.5 \times t_{\text{critical}} \times \text{SD}$ ). However, in the context of mixed designs,  
 255 as in this case, this error bar can only be used for within-subject comparisons. The  
 256 difference between OCD and CTL in mean causality judgments at  $\Delta P = -0.6$  was not  
 257 significant. However, controls but not OCD patients subjectively detected a difference  
 258 between neighboring levels of negative programmed contingency between  $\Delta P = -0.3$  and  
 259  $\Delta P = -0.6$ ). \*p<0.05, for within-group comparison. **(C)** Response rate as a function of causality  
 260 judgment. The two groups differentially employed action–outcome knowledge to guide their  
 261 behavior (# p < 0.05, group x quadratic causality judgment interaction). Dashed lines show  
 262 predictions from the best-fit model (predicting response rate using group and both quadratic  
 263 and linear effects of causality judgments); points/error bars (SEMs) show values clustered by  
 264 programmed contingency. The apparent discrepancy for strongly negative causality  
 265 judgments reflects the fact that the model uses within-subject regression and that not all  
 266 patients gave causality ratings that extended to the left-hand end of the range (see **Figure**  
 267 **S2**). CTL, controls; OCD, patients with obsessive–compulsive disorder. Programmed  
 268 contingency refers to the a priori experimentally programmed contingency, resulting from the  
 269 a priori programmed conditional probabilities. As described in the main text, data were  
 270 collapsed across blocks having equal contingencies [ $\Delta P = -0.6$ , Block 6;  $\Delta P = -0.3$ , Block 5,  
 271 Block 9;  $\Delta P = 0.0$ , Block 2, Block 3, Block 4, Block 8, Block 12;  $\Delta P = 0.3$ , Block 7, Block 11;  
 272  $\Delta P = 0.6$ , Block 1, Block 10. See Table 1 for naming of the blocks]; specific contingency  
 273 transitions to detect habitual responding are shown in Figure 4.  
 274

275 **Effect of instrumental contingency on causality judgments.** Causality ratings were a  
276 function of action-outcome contingency across both groups (**Table 1** and **Figure 3B**)  
277 (contingency,  $F_{4,208}=74.099$ ,  $p<0.001$ ). The two groups did not differ in their judgements of  
278 causality (group,  $F_{1,52}=2.379$ ,  $p=0.129$ ; group $\times$ contingency,  $F_{4,208}=1.084$ ,  $p=0.366$ ). The  
279 results did not change when considering only medicated OCD and controls or only  
280 unmedicated OCD and controls. There were no between-group effects nor interactions that  
281 depended on medication status in OCD patients (all  $p>0.186$ ) (**Figure S1**).

282

283 **Relationship between response rate and causality judgments.** Patients with OCD and  
284 controls differed in the way that causality judgements predicted response rate, in a non-  
285 linear fashion. Overall, response rate was linearly predicted by causality ratings  
286 ( $F_{1,45.449}=58.154$ ,  $p<0.001$ ). We did not identify a difference in this linear relationship between  
287 groups (group  $\times$  causality<sub>linear</sub>:  $F_{1, 45.449}=1.489$ ,  $p=0.229$ ). However, there was a significant  
288 non-linear effect as well, which differed between groups (group $\times$ causality<sub>quadratic</sub>  
289  $F_{1,204.827}=3.959$ ,  $p=0.0479$ ) (**Figure 3C**). Residuals were larger in the OCD group (F test of  
290 residual variances by group:  $F_{323,323}= 1.28$ ,  $p=0.013$ ), indicating a slightly poorer model fit in  
291 OCD; however, the residual variance was only 28% larger (controls 0.024; OCD 0.0308)  
292 which does not jeopardize the group comparisons [29].

293 This indicated an altered, non-linear relationship between causality judgments and response  
294 rate in patients and represents a formal demonstration of the differential and blunted use of  
295 action-outcome knowledge to modulate behavior in patients, also supported by patients'  
296 reports (**Table 2**). Thus, in patients, for positive contingencies, behavior persisted after  
297 contingency degradation despite intact and accurately reported action-outcome knowledge  
298 of the causal effect of their actions. For negative contingencies, the best-fit model predicted  
299 increased response rate in patients when they believed their actions to be detrimental. The  
300 equal response rates (**Figure 3A**) may have been a consequence of this effect plus a non-  
301 significant tendency to believe their actions to be less detrimental than controls at highly  
302 negative contingencies (**Figure 3B**, programmed contingency -0.6). We analyzed response

303 rate for different time windows of each block, excluding the possibility that such dissociation  
 304 was due to different learning processes in OCD patients (**Figure S3**). Habitual responding  
 305 emerged towards the end of each block, closer in time to when subjects reported their  
 306 causality judgments. This rules out the possibility that OCD patients were simply slower to  
 307 learn the contingency: habitual responding was observed at times close to subjective  
 308 causality judgments for which OCD patients did not differ from controls.

309

310 **Table 2 Subjective accounts when the contingency was zero**

|                                                                       | Subjective accounts of behavior adopted (multiple choice)                                 |            |                      |            |                   |            |               |            |                               |            |   |     |     |
|-----------------------------------------------------------------------|-------------------------------------------------------------------------------------------|------------|----------------------|------------|-------------------|------------|---------------|------------|-------------------------------|------------|---|-----|-----|
|                                                                       | Other                                                                                     |            | Mostly did not press |            | Sometimes pressed |            | Kept Pressing |            |                               |            |   |     |     |
| <b>CTL*</b>                                                           | 2                                                                                         |            | 17                   |            | 7                 |            | 1             |            | $\chi^2=17.839,$<br>$p<0.001$ |            |   |     |     |
| <b>OCD*</b>                                                           | 4                                                                                         |            | 3                    |            | 5                 |            | 10            |            |                               |            |   |     |     |
|                                                                       | <b>CTL</b>                                                                                | <b>OCD</b> | <b>CTL</b>           | <b>OCD</b> | <b>CTL</b>        | <b>OCD</b> | <b>CTL</b>    | <b>OCD</b> | <b>CTL</b>                    | <b>OCD</b> |   |     |     |
| Subjective accounts of behavior (summary of spontaneous descriptions) | <b>No point/No difference</b><br>( <i>"Pressing or not did not make any difference"</i> ) | 1          | -                    | 14         | 2                 | —          | 2             | 3          | —                             | -          | 1 | 63% | 27% |
|                                                                       | <b>Checking</b><br>( <i>"To check whether occurrence of reward changed"</i> )             | 1          | 2                    | 1          | -                 | —          | 2             | -          | —                             | -          | 1 | 15% | 14% |
|                                                                       | <b>Habit</b><br>( <i>"Can't stop/ In the habit of pressing"</i> )                         | -          | -                    | -          | -                 | —          | -             | -          | —                             | -          | 2 | 0%  | 9%  |
|                                                                       | <b>Just in case</b><br>( <i>"Just in case reward stopped when not pressing the bar"</i> ) | -          | -                    | -          | 1                 | —          | -             | 1          | —                             | -          | 1 | 0%  | 14% |
|                                                                       | <b>Mind wandering</b><br>( <i>"Kept pressing because mind wandering"</i> )                | -          | -                    | -          | -                 | —          | -             | -          | —                             | -          | 1 | 0%  | 4%  |
|                                                                       | <b>Other**</b>                                                                            | -          | 2                    | 2          | -                 | —          | 3             | 1          | —                             | 1          | 4 | 22% | 32% |

311 \*Absence of contingency identified CTL: 27/27; OCD: 22/22. Data were not available for 5  
 312 OCD patients. Controls and OCD recognized the absence of contingency in relevant blocks,  
 313 and that key pressing did not make a difference. The majority of controls did not press the  
 314 key. In contrast, more OCD patients continued to press the key. Subjective accounts for  
 315 behavior adopted also differed, with the majority of controls giving as a reason that pressing  
 316 or not pressing made no difference to the occurrence of the outcome. In contrast, a minority  
 317 of OCD patients gave this subjective account; the majority justified their behavior instead as  
 318 checking, habit or "just in case" conduct. \*\*7 OCD patients gave subjective accounts that  
 319 were classified as "Other" (2, "Don't know"; 1, "I pressed the space bar because it was less  
 320 boring"; 1, "Pressing was entertaining and did not cause any loss"; 1, "I pressed sometimes  
 321 according to the feeling of what it was better"; 1, "I pressed because the money was  
 322 occasionally coming"; 1, "I pressed the spacebar sometimes pressed because otherwise  
 323 nothing was happening").  
 324

325 **Habit/goal-directed ratio score.** We tested for differences in habitual responding directly,  
326 by examining contingency transitions in which  $P(O|A)$  was positive and held constant and  
327  $P(O|\sim A)$  was increased, to test precisely if increased responding observed for  $\Delta P=0.3$   
328 (**Figure 3A**) was due to habitual behavior. To match number of observations for each  
329 condition, we focused on contingency degradation occurring after the implicit training phase.  
330 We therefore compared responding for blocks in which  $P(O|A)$  was held constant at 0.6 and  
331  $P(O|\sim A)$  increased from 0 to 0.3 leading to a degraded contingency of  $\Delta P=0.3$  (Block 10,  
332 Block 11), by computing a ratio score. On this measure (contingent/(contingent+degraded  
333 see Material and Methods), which controls for response variability across subjects, high  
334 scores (close to 1) indicate responsivity to the contingency change, and low scores (close to  
335 0.5) indicate habitual responding. Whereas control subjects showed a robust decline in  
336 responding upon contingency degradation, as indicated by a ratio-score well above 0.5 (one-  
337 sample t test tested against 0.5,  $t_{26}=5.918$ ,  $p<0.001$ ) patients with OCD responded nearly  
338 equally in both conditions, with their ratio-score being close to 0.5 (one-sample t test tested  
339 against 0.5,  $t_{26}=0.585$ ,  $p=0.563$ ). There was a significant between-groups difference in the  
340 ratio-score ( $t_{52}=3.350$ ,  $p=0.002$ ) (**Figure 4A**). Furthermore, subjects were classified  
341 dichotomously as 'goal-directed' (ratio-score $>0.5$ ) or 'habitual' (ratio-score $\leq 0.5$ ). A higher  
342 proportion of 'habitual' subjects was found in the OCD group (controls habitual 2/27; OCD  
343 habitual 12/27;  $\chi^2_1=7.811$ ,  $p=0.005$ ). There was no correlation between the ratio-score and  
344 symptom severity (Y-BOCS) in OCD patients ( $r=-0.101$ ,  $p=0.625$ ).

345 Similarly, we observed a marginal effect for increased responding when  $\Delta P=0.0$  (**Figure 3A**).  
346 Therefore, we calculated a ratio-score for blocks for which the action-outcome relationship  
347 was contingent ( $\Delta P=0.6$ ,  $P(O|A)=0.6$ ,  $P(O|\sim A)=0.0$ , Block 10) and then completely degraded  
348 to  $\Delta P=0.0$  by superimposing a non-contingent schedule ( $\Delta P=0.0$ ,  $P(O|A)=0.6$ ,  $P(O|\sim A)=0.6$ ,  
349 Block 12). Even though both groups showed ratio scores significantly different from 0.5 (one-  
350 sample t test tested against 0.5, controls,  $t_{26}=7.334$ ,  $p<0.001$ ; OCD,  $t_{26}=3.388$ ,  $p=0.002$ ),  
351 OCD patients showed diminished goal-directed behavior compared with controls (ratio-

352 score,  $t_{52}=2.23$ ,  $p=0.03$ ) (**Figure 4B**). There was no difference between OCD and controls in  
353 the ratio score for when action-outcome relationship was contingent ( $\Delta P=0.3$ ,  $P(O|A)=0.3$ ,  
354  $P(O|\sim A)=0.0$ , Block 7) and then completely degraded to  $\Delta P=0.0$  by superimposing a non-  
355 contingent schedule ( $\Delta P=0.0$ ,  $P(O|A)=0.3$ ,  $P(O|\sim A)=0.3$ , Block 8) (**Figure 4C**).  
356 The response to contingency degradation was impaired in OCD patients when degradation  
357 occurred from high baseline contingency ( $\Delta P=0.6$ , **Figure 4A-B**) but not from low  
358 contingency ( $\Delta P=0.3$ , **Figure 4C**). We therefore investigated responses rate at high and low  
359 instrumental contingencies in OCD patients and controls. OCD patients responded more  
360 than controls when the overall instrumental contingency was low ( $\Delta P=0.3$ ,  $P(O|A) = 0.3$ ,  
361  $P(O|\sim A) = 0.0$ , Block 7) (OCD =  $0.62 \pm 0.20$ ; Controls =  $0.49 \pm 0.22$ ; post hoc t-test  $F_{52} =$   
362  $4.961$ ,  $p = 0.030$ , **Table 1** and **Figure S4**). In addition, OCD patients did not show significant  
363 modulation of response rate from high ( $\Delta P=0.6$  [ $P(O|A) = 0.6$ ,  $P(O|\sim A) = 0.0$ ], Block 10) to  
364 low ( $\Delta P=0.3$  [ $P(O|A)=0.3$ ,  $P(O|\sim A)=0.0$ ], Block 7) instrumental contingency (Patients, Block  
365 10:  $0.56 \pm 0.23$ ; Patients, Block 7:  $0.62 \pm 0.20$ ). In contrast, controls did show such modulation  
366 (Controls, Block 10:  $0.62 \pm 0.21$ ; Controls, Block 7:  $0.49 \pm 0.22$ ). There was in fact a significant  
367 interaction ( $F_{1,52}=11.674$ ,  $p=0.001$ ) between Group (Control, Patients) and Block (Block 7,  
368 Block 10). These findings therefore suggest OCD patients had increased response rate  
369 when there was a low instrumental contingency between the action and the outcome,  
370 although they were able to modulate their response rate when a contingency degradation  
371 occurred against the background of such low contingency.  
372 To test the effect of repetition in the development of habits, we computed the ratio score for  
373 the early phases of the experimental design (Early: Block 1 and Block 2) and compared with  
374 late ones (Late: Block 10 and Block 12). There was no main effect of time ( $F_{1,52}=0.083$ ,  
375  $p=0.775$ ) nor a time  $\times$  group interaction ( $F_{1,52}=0.648$ ,  $p=0.425$ ). Therefore, we did not detect  
376 an effect of repetition in the development of habits [30]. Across groups, habitual behavior in  
377 the early phases of the experimental design was associated with higher OCD traits  
378 measured by the OCI-R ( $r=-0.280$ ,  $p=0.046$ ).



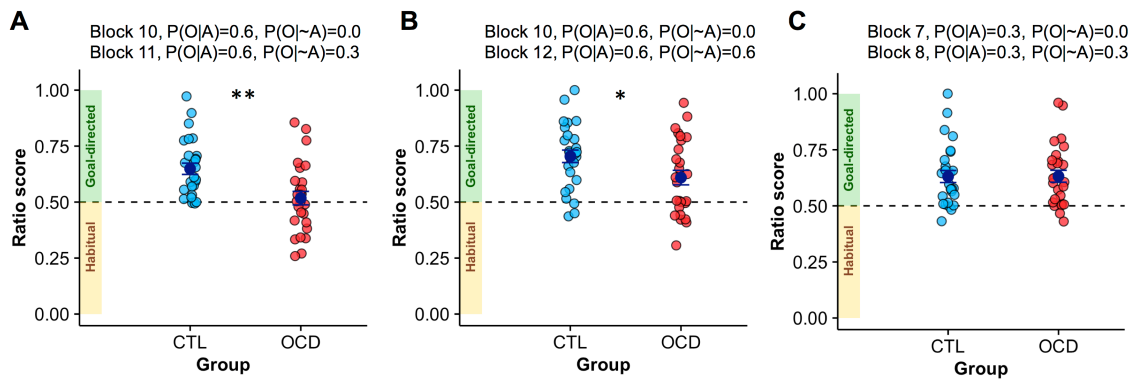

379

380 **Figure 4 Habit/goal-directed ratio-scores for contingent and corresponding degraded-**  
 381 **contingency conditions identifies habitual responding in OCD patients.** A ratio score  
 382 was calculated for pairs of blocks across which the contingency was degraded by keeping  
 383  $P(O|A)$  constant and increasing  $P(O|\sim A)$ . The first block of each pair is termed “contingent”,  
 384 as a shorthand, and the second “degraded”; the ratio score was then calculated as  
 385 contingent/(contingent+degraded). High scores (close to 1) indicate that the subject  
 386 responds to the degradation; low scores (close to 0.5) indicate insensitivity to the  
 387 degradation and therefore habitual responding. **(A)** Ratio scores for pairs of blocks for which  
 388 the contingency was degraded from  $\Delta P=0.6$  ( $P(O|A)=0.6$ ,  $P(O|\sim A)=0.0$ , Block 10) to  $\Delta P=0.3$   
 389 ( $P(O|A)=0.6$ ,  $P(O|\sim A)=0.3$ , Block 11). OCD patients displayed increased habitual behavior  
 390 ( $t_{52}=3.350$ ,  $p=0.002$ ). **(B)** Ratio scores for pairs of blocks for which the contingency was  
 391 degraded from  $\Delta P=0.6$  ( $P(O|A)=0.6$ ,  $P(O|\sim A)=0.0$ , Block 10) to  $\Delta P=0.0$  ( $P(O|A)=0.6$ ,  
 392  $P(O|\sim A)=0.6$ , Block 12). OCD patients showed increased habitual behavior compared with  
 393 controls ( $t_{52}=2.23$ ,  $p=0.03$ ). **(C)** Ratio scores for pairs of blocks for which the contingency  
 394 was degraded from  $\Delta P=0.3$  ( $P(O|A)=0.3$ ,  $P(O|\sim A)=0.0$ , Block 7) to  $\Delta P=0.0$  ( $P(O|A)=0.3$ ,  
 395  $P(O|\sim A)=0.3$ , Block 8). Error bars: SEM. CTL, controls; OCD, patients with obsessive–  
 396 compulsive disorder. \* $p<0.05$ ; \*\* $p<0.01$ .

397

398

399 **Absence of depressive realism in OCD.** Previous data have shown that healthy non-

400 depressed subjects have biased higher estimates of causality judgments when the

401 contingency is zero [31]. This erroneous estimation arises when contingent and non-

402 contingent outcomes occur frequently (i.e. high density of reinforcement), but not when

403 contingent and non-contingent outcomes occur infrequently (i.e. low density of

404 reinforcement). In contrast, depressed individuals show a “depressive realism” whereby,

405 irrespective of the density of reinforcement, correctly report having no causal effect on the

406 occurrence of the outcome [31]. Because OCD patients showed higher depression scores

407 compared with healthy subjects, we tested possible between-group differences in causality

408 judgments for  $\Delta P=0.0$  blocks with different densities of reinforcement (Block 4, 8, and 12,

409 **Table 1**). Selection was limited to the Latin square phase to have an equal number of

410 observations for each condition. Estimation of control was higher for higher reinforcement

411 density ( $F_{2,104}=8.365$ ,  $p<0.001$ ) (**Figure 5A**), with no between-groups differences (group,  
412  $F_{1,52}=0.171$ ,  $p=0.681$ ; group $\times$ reward density,  $F_{2,104}=0.124$ ,  $p=0.883$ ), despite higher levels of  
413 depressive symptoms in OCD patients.

414

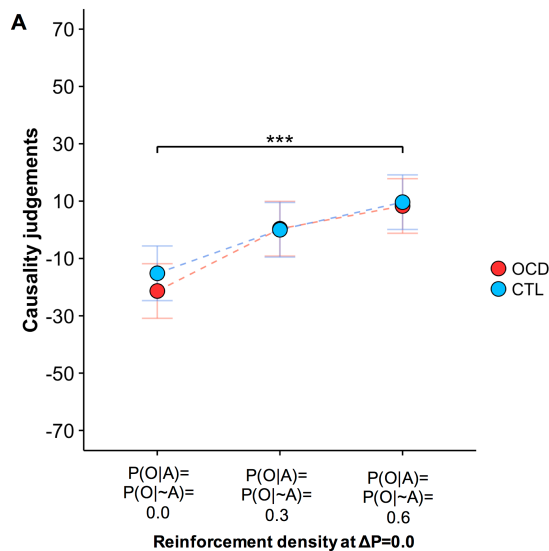

415  
416

417 **Figure 5 OCD patients show intact causality judgments when when the contingency**  
418 **was zero proving absence of ‘depressive realism’ (A)** For both controls subjects and  
419 patients with OCD, causality judgments increased as a function of higher density of  
420 reinforcement even though there was no causal association between the action and the  
421 outcome (contingency  $\Delta P = 0.0$ ) in all three situations. Error bar indicates Fisher’s Least  
422 Significant Difference (FLSD) to facilitate post-hoc comparisons (error bars are  $\pm 0.5 \times t_{\text{critical}}$   
423  $\times$  SD). However, in the context of mixed designs, as in this case, this error bar can only be  
424 used for within-subject comparisons. \*\*\* $p<0.001$ , main effect of density of outcome. CTL,  
425 controls; OCD, patients with obsessive–compulsive disorder.  
426

427

## 428 DISCUSSION

429 Our findings show a failure in a learning process regulating action control based on the  
430 relationship between actions and their consequences in a sample of individuals  
431 characterized by clinically relevant high levels of compulsive behaviors. Patients with OCD  
432 exhibited increased response rates when outcomes were less contingent upon responding  
433 (**Figure 3**), very likely as a consequence of enhanced S-R habitual tendencies (**Figure 4**). In  
434 contrast, explicit action–outcome knowledge was intact: patients were capable of accurate  
435 subjective assessments of the cause–effect relationship between actions and their



436 consequences, which did not differ from those of controls. However, in patients, action–  
437 outcome knowledge did not translate normally into action. Increased habitual behavior was  
438 dissociated from intact explicit action–outcome knowledge about the effectiveness of their  
439 actions. Moreover, in patients, response rate was augmented when they believed their  
440 actions to be detrimental (**Figure 3C**).

441  
442 OCD patients exhibited excessive, presumed habitual, responding when the action–outcome  
443 contingency was degraded, and the action was thus less causally linked to an outcome, the  
444 effect being present when contingency was partially and completely degraded. The  
445 relationship between subjective causality judgement and behaviour also predicted excessive  
446 responding for actions patients believed to be detrimental (**Figure 3C**), in keeping with the  
447 clinical manifestation of persistent behavior even when recognized as being harmful.

448 Our results showed that OCD patients showed habitual behavior when degradation occurred  
449 from high levels of contingency (4A, 4B and Supplementary S4A, S4B). When the  
450 degradation occurred from low levels of contingency, OCD patients were not habitual (4C  
451 and Supplementary S4C). While no *a priori* hypothesis was formulated, we observed that  
452 OCD patients kept their response rate constant regardless of whether there was high or low  
453 contingency between the action and the outcome. This behavior highlights how OCD  
454 patients exhibited increased response rates when there was a low instrumental contingency  
455 between the action and the outcome.

456 Translational work in rats [12], marmoset monkeys [17], and humans [18,20] using  
457 contingency degradation has shed light on possible cortico-striatal determinants of goal-  
458 directed and habitual actions. In rats, pharmacological manipulation of the prelimbic cortex  
459 and the dorsomedial striatum (the putative homologue of the caudate nucleus in humans)  
460 prevented the encoding of action–outcome associations during instrumental conditioning  
461 [32]. In marmosets, insensitivity to contingency degradation has been found following lesions  
462 to the perigenual anterior cingulate cortex and the orbitofrontal cortex [17]. In humans,  
463 activity in the medial prefrontal cortex (PFC)/medial orbital cortex and the anterior caudate is

464 associated with contingency learning and goal-directed behavior [18,20,33]. In healthy  
465 volunteers, reduced gray matter volume in the caudate correlates with a propensity towards  
466 habits [23]. In OCD patients, hyperactivity of the caudate nucleus is associated with  
467 excessive habit formation, tested in avoidance by means of outcome devaluation [10]. These  
468 fronto-striatal regions are implicated in the pathophysiology of OCD [21]; therefore, habitual  
469 responding, manifested as lack of behavioral suppression of action upon contingency  
470 degradation, plausibly depends on abnormalities in such circuits. Animal work has also  
471 shown differential sensitivity to outcome devaluation and contingency degradation [34]. Such  
472 a distinction can be now tested in humans as well, using the paradigm devised here and  
473 those focusing on outcome devaluation. By contrast, response rates in control participants  
474 faithfully tracked the level of instrumental contingency, in line with other studies in healthy  
475 populations [18–20].

476 Accurate subjective judgments in both groups on the causal relationship between actions  
477 and outcomes, especially in the case of positive contingencies, indicated intact action–  
478 outcome knowledge not only in controls, as previously shown [13,18–20], but also in OCD.  
479 For OCD patients, we also observed that for negative contingencies only, actions were  
480 reported to be less detrimental than experienced. Although these findings should be  
481 interpreted with caution in the context of a lack of a main effect, they might relate to the  
482 maladaptive nature of OCD where actions are repeated despite negative consequences.  
483 Here, our findings might suggest slight inaccuracies of subjective judgement in case of  
484 negative contingencies which might contribute to patients' perception of their actions to have  
485 less disadvantageous consequences than experienced.

486 Previous studies have shown that affective states influence how objective contingencies are  
487 perceived [31]. In situations in which there is a lack of action–outcome contingency,  
488 overestimation of causal control is observed in non-depressed people when the non-  
489 contingent reward occurs frequently. Such an effect is not found in depressed individuals,  
490 who show an accurate detection of the lack of contingency (i.e. “depressive realism”). In the

491 present study, when the contingency was zero, causality judgments increased as a direct  
492 function of the density of the reward and equally in controls and patients.

493 In addition, even if patients were relatively more depressed than healthy volunteers, their  
494 emotional/affective state did not influence their perception of the environmental  
495 contingencies in a way that was significantly different from that of healthy volunteers (**Figure**  
496 **2B**).

497

498 Our findings also demonstrate that OCD patients used their knowledge about environmental  
499 contingencies to guide their actions in a manner that differed from controls. Subjective  
500 detection of instrumental contingency was dissociated from expressed behavior in patients.  
501 For positive contingencies [ $P(O|A) > P(O|\sim A)$ ], OCD patients displayed increased response  
502 rates but accurate subjective reports of contingency. For negative contingencies,  
503 [ $P(O|A) < P(O|\sim A)$ ], in OCD patients response rates were not affected but there was evidence  
504 of contingencies being reported as less detrimental than experienced. Increased response  
505 rates were observed when the introduction of non-contingent outcomes reduced  
506 contingency, and inaccurate contingency ratings were observed when the non-contingent  
507 outcomes were more likely than contingent ones. Even though it remains to be clarified why  
508 non-contingent outcomes had a differential effect on behavior and reported causality  
509 judgments, it appears plausible that patients had particular difficulties in integrating non-  
510 contingent conditional probabilities. Such an effect might be dependent on a circuit including  
511 the posterior caudate and the inferior frontal gyrus, which has been shown to selectively  
512 decode non-contingent conditional probabilities [18].

513 Previous studies have shown that functional activity of the inferior and superior parietal  
514 lobule and the middle frontal gyrus scales with subjective reports of instrumental contingency  
515 [18]. Parietal abnormalities [35] together with diminished caudate–parietal connectivity  
516 [36,37] characterize OCD. Such abnormalities might contribute to inefficient use of explicit  
517 knowledge of instrumental contingencies to guide behavior in OCD. Therefore, these  
518 observations prompt the hypothesis that the inability to modulate behavior according to

519 action–outcome contingencies in OCD patients might be due not only to abnormal striatal  
520 encoding of action–outcome contingencies, but also (or alternatively) to an inability of  
521 action–outcome metacognitive knowledge (putatively dependent on parietal activity) to guide  
522 behavior. In this respect, empirical testing will clarify if a lack of integration between the  
523 fronto-parietal system and the caudate nucleus contributes to the ego-dystonic, compulsive  
524 nature of OCD.

525 More generally, cognitive theories of OCD [7,38] conceptualize the disorder in light of an  
526 exaggerated appraisal of intrusive thoughts, which is believed to be the critical factor in the  
527 maintenance of the disorder. In this respect, OCD is identified in terms of the impact of  
528 inflated evaluation of intrusive negative thoughts on action. In the present study, in direct  
529 contrast, patients with OCD showed intact knowledge of the contingency, especially in the  
530 case of positive contingencies, between the action and the outcome but exaggerated  
531 responding despite this correct appraisal of contingencies. Therefore, even if OCD subjects  
532 were aware of the contingency, they did not use it to guide their behavior. Rather than  
533 supporting a model whereby OCD is maintained by exaggerated and dysfunctional appraisal  
534 of action contingencies, the findings suggest that exaggerated actions, possibly rooted in a  
535 propensity towards the development of habits [39], lie at the core of the disorder.

536 We found increased behavioral reliance on habits in OCD, in agreement with previous  
537 studies which have shown habitual behavior in OCD by using outcome devaluation in  
538 appetitive [9] and aversive domains [11]. Here, we have extended those findings by testing  
539 habits via contingency degradation as defined by Dickinson and colleagues [1].

540 We found a correct appraisal of the contingency between action and outcome, in line with  
541 previous data showing intact awareness of explicit associative contingencies in case of  
542 outcome devaluation in this patient population [11], though in a context of multiple action-  
543 outcomes associations OCD patients show weaker knowledge on the causal relationship  
544 between actions and their respective outcomes [9]. Imbalances between the goal-directed

545 and the habitual system in OCD, which we identified here, has also been shown in OCD  
546 using neurocomputational models [23].

547 Finally, our work has theoretical implications for understanding goal-directed and habitual  
548 systems. In fact, it is common to assume competition between these two systems (i.e., that if  
549 a behavior is not under goal control, then it must be a habit). However, this study contributed  
550 to the relevant literature in showing that goal-directed and habitual forms of behavior can co-  
551 exist in accordance with recent views [40]. Namely subjective reports in OCD patients  
552 tracked goal-directed contingencies correctly, while behavior was presumably habitual.  
553 Therefore, this evidence suggests that adaptive behavior depends on a fine tuning and  
554 coordination between the two systems, which probably go awry in OCD patients.

555 By contrast with classical theories predicting development of habits due to repetition over  
556 time [30], we did not observe a shift from goal-directed to habitual behavior over early and  
557 late experimental phases. There was no statistical effect of repetition. This might be due to a  
558 limitation of the experimental design, which did not lend itself to an optimal investigation of  
559 this aspect. In fact, participants experienced the first three blocks in the same order at the  
560 beginning of the experiment, but blocks were then presented in a semi-randomized design.  
561 This manipulation might conceivably have diluted the effect of repetition due to the different  
562 number of instrumental contingency blocks experienced prior to the relevant critical test  
563 across subjects. In addition, the relatively short duration of the task may have limited the  
564 possibility of detecting such training effects. Recent evidence also suggests that limited  
565 overtraining in instrumental behaviors fails to enhance development of habits (de Wit et al.,  
566 submitted). In the initial phase of the experimental session, there was variability in the extent  
567 to which goal-directed or habitual strategies were adopted in both groups and a tendency for  
568 an association with OCD traits. However, as this correlation was not marked and was  
569 observed only when considering the whole sample, replication is warranted. OCD is known  
570 to be linked to abnormalities of serotonergic function, and there is evidence in healthy  
571 humans that diminished serotonin neurotransmission promotes habitual behavior [41]. We  
572 did not find an effect of medication, but given the small samples size we had insufficient

573 power to draw definite conclusions. However, it seems unlikely that the effect observed was  
574 due to medication status of the OCD patients, as such medication is designed to increase  
575 serotonergic transmission.

576 In conclusion, this study reinforces the hypothesis that habit formation is a contributor to a  
577 disorder of compulsivity, using a novel, independent, valid behavioral assay based on  
578 contingency degradation that can readily be translated across species. A mismatch between  
579 explicit action–outcome knowledge and behavior was identified, possibly reflecting the ego-  
580 dystonic nature of OCD, with implications for the development of new behavioral and  
581 pharmacological interventions aimed at suppressing habits rather than focusing on  
582 dysfunctional beliefs.

583

## 584 **MATERIAL AND METHODS**

585 **Participants.** The study included 27 OCD patients and 27 controls, matched for relevant  
586 demographic variables (**Table S1**). Control subjects were recruited from the community;  
587 none of them was on psychiatric medication and they had never suffered from a psychiatric  
588 disorder. Patients were recruited through clinical referral from local psychiatric and  
589 psychological services or local advertisement. In addition, patients who participated in  
590 previous independent studies were contacted by phone. A consultant psychiatrist made  
591 DSM-5 diagnoses using an extended clinical interview, supplemented by the Mini  
592 International Neuropsychiatric Interview [42]. Patients were included if they met criteria for  
593 the diagnosis of OCD with no current comorbidity. Patients with OCD were not enrolled in  
594 the study if they scored less than 12 on the Yale–Brown Obsessive–Compulsive Scale (Y-  
595 BOCS) [43] and, in line with evidence that hoarding might represent a separate clinical entity  
596 [44], were excluded if they reported hoarding symptoms. Exclusion criteria for all  
597 participants were: current substance dependence, head injury, and current depression,  
598 indexed by Montgomery–Åsberg Depression Rating Scale exceeding 16 [45] during  
599 screening. Self-reported measures of anxiety were collected using the State-Trait Anxiety  
600 Inventory (STAI) [46]; and, in addition to Y-BOCS scores, self-reported measures of OCD

601 symptomatology were collected using the Obsessive Compulsive Inventory-Revised (OCI-R)  
602 [47]. In patients, depression and anxiety symptoms were below the threshold for diagnosis of  
603 depressive or anxiety disorder (**Table S1**). 19 of the 27 patients were taking stable doses of  
604 serotonin reuptake inhibitor (SSRI) medication for a minimum of 8 weeks prior taking part in  
605 the study. As an adjunct to their SSRI, 3 of these patients were taking an antipsychotic  
606 (quetiapine). The remaining 8 patients were unmedicated, being either drug-naïve or off  
607 medication for at least 8 weeks prior taking part of the study. Most of the participants  
608 completed two other behavioural tasks, unrelated to the present study. The study was  
609 approved by the NHS East of England Cambridge Central Research Ethics Committee.  
610 Participants were reimbursed for their time and informed consent was obtained prior  
611 participation. No statistical methods were used to pre-determine sample size but our sample  
612 sizes are similar to those generally employed in the field, with power of 0.8 to detect effect  
613 sizes of 0.78 at  $\alpha=0.05$ , two-tailed.

614

615 **Procedure.** Contingency degradation manipulation requires that the subject experiences the  
616 likelihood of the outcome given the presence or absence of a response. We adopted a free-  
617 operant, self-paced procedure whereby the participant could decide whether to press the  
618 space bar or not when presented with a white triangle on the screen. However, in a free-  
619 operant paradigm, the degree of contingency experienced can be determined partly by the  
620 behavior, and experienced contingency might in principle vary substantially across  
621 participants (e.g., someone who never responds would never experience  $P(O|A)$ , and  
622 someone who never ceases responding would never experience  $P(O|\sim A)$ ). In schedules  
623 where reinforcer delivery is influenced by time (e.g. with a maximum reinforcer delivery rate  
624 or on an interval schedule), different subjects might experience similar reinforcer delivery  
625 rates despite different response rates. Therefore, we divided time into short 1 second  
626 interval (bin), and calculated 'response' versus 'no response' on a per-bin basis ensuring a  
627 close correspondence between programmed and experienced contingencies [16].  
628 Accordingly, unbeknown to the participant each block was divided into bins, treated as a trial



629 by the experimenter. The procedure was free-operant for the subject as trials were  
630 unsignaled and there was no inter-trial interval. In doing so, interpretation of our findings was  
631 not confounded by between-groups differences in experienced contingencies (Table 1).

632

633 **Experimental task.** A white triangle permanently on the screen signaled the participant that  
634 he/she was free to press the space bar (or not press). When a reward was delivered, either  
635 following a key-press or not, a 25p image was shown at the end of the bin for 500 ms with  
636 the text “Reward, you win!” and a tone (**Figure 2A**). Upon each response, the triangle turned  
637 yellow until the end of the *a priori* specified bin to signal that a response has been recorded  
638 and prevent multiple responses within the same 1 second bin. If no outcome was delivered,  
639 no feedback was given and the next bin started. Note that if the participant did not respond  
640 for several time bins the white triangle stayed on the screen without anything else  
641 happening, unless a non-contingent reward occurred. A running total of pence accumulated  
642 within the block was displayed in the top right corner of the screen. There were 12 blocks,  
643 not explicitly labeled as such to the participants. However, at the beginning of each block the  
644 running total of pence was reset to 0, and at the end of each block causality judgments were  
645 collected on the relationship between pressing the key and receiving the 25p reward (**Figure**  
646 **2A**). For each subject, the first 3 blocks (Blocks 1-3) were always presented in the same  
647 order (high contingency, degradation, extinction) providing an implicit training phase. The  
648 remaining 9 blocks (i.e., Block 4-12) were presented according to a Latin square design  
649 across participants (**Table 1**). Each block lasted for 2 minutes (120 unsignaled bins). If a  
650 response occurred during a given bin, the outcome was delivered at the end of the bin with  
651 probability  $P(O|A)$  defined *a priori* for that block; if no response occurred, the outcome was  
652 delivered with probability  $P(O|\sim A)$  for that block (**Figure 2B**). Only the first space-bar press  
653 within the bin had any programmed consequences. The total number of responses within  
654 each bin was also recorded, but additional responding beyond the first response of the bin  
655 had no programmed consequences. The experiment was programmed using Psychtoolbox 3  
656 [48–50]. The overall duration of the task was variable due to its free-operant nature, i.e. the



657 rate of responding which was variable across participants determined the number of  
658 outcomes. In fact, we had a fixed amount of unsignalled bins for each block but delivery of a  
659 reinforcer delayed the start of the next bin. Hence the total duration depended also on the  
660 number of outcomes delivered but the average time for completion (34 minutes) did not differ  
661 between groups.

662 Our implementation of the task differed from previous ones available in the literature for  
663 some crucial aspects. Firstly, by using unsignalled time bins and by specifying the  
664 conditional probabilities *a priori* we ensured that experienced instrumental contingencies did  
665 not deviate substantially from the programmed ones. Secondly, in line with experimental  
666 studies in rodents where there is no explicit 'punishment' for responding we did *not* include a  
667 cost for responding (see Supplementary Material and Figure S5 for supporting results from  
668 pilot experiments with and without such costs). We found that introducing a cost induced a  
669 generalized reduction of responding, with no specific effect on determining responding in  
670 face of degradation (see Supplemental Material).

671

672 **Check on experienced contingency.** In order to compute the experienced contingency for  
673 each subject for a given block, we recorded (i) the number of contingent outcomes (rewards  
674 delivered upon key press) (C1); (ii) the number of times that a key press was not associated  
675 with the delivery of an outcome (C2); (iii) the number of non-contingent outcomes (rewards  
676 delivered in the absence of a key press) (C3); (iv) the number of times that there was no key  
677 press and no outcome delivered (C4). We thus computed the experienced contingency  
678 based on the formula for contingency ( $\Delta P$ ) [16]:

679

680

$$681 \quad \Delta P = P(O|A) - P(O|\sim A)$$

682 as:

$$683 \quad \left[ \frac{C1}{(C1 + C2)} \right] - \left[ \frac{C3}{(C3 + C4)} \right]$$

684 In very few instances experienced contingency could not be computed because there were  
685 no occurrences of either C1 and C2 or C3 and C4. In other words, the subject did not press  
686 the space bar throughout the block, or adopted a constant pressing rate with a consequential  
687 lack of no trials with no responses. However, in our entire data set (648 blocks; 12 blocks x  
688 54 participants) this occurred only on 10 single occasions with 7 controls and 3 OCD  
689 patients adopting one of the specified strategies in one of the blocks during their  
690 experimental session. Inclusion or exclusion of these subjects did not affect the main  
691 findings, therefore, we retained data from these subjects for the analysis.

692 As expected, based on our implementation of the task, there was a very high correlation  
693 between the mean experienced contingency (based on experienced event frequencies)  
694 (Table 1) and the contingencies programmed a priori, for controls ( $r=0.999$ ,  $p<0.001$ ) and  
695 patients ( $r=0.998$ ,  $p<0.001$ ) alike. We therefore used the programmed contingencies for  
696 subsequent analysis. Importantly, the interpretation of our findings was not confounded by  
697 different levels of experienced contingencies between the two groups as no main effect of  
698 group ( $F_{1,48.49}=0.01$ ,  $p=0.940$ ) nor interaction between group and block ( $F_{11,559.95}=1.06$ ,  
699  $p=0.395$ ) on experienced contingency was found.

700 As expected, there was a main effect of programmed contingency on the number of  
701 outcomes obtained ( $F_{4,208}=38.831$ ,  $p<0.001$ ). Even though OCD patients responded more at  
702 certain levels of instrumental contingencies, such increased behavior was not sufficient to  
703 lead to a higher number of obtained outcomes. In fact, there was no main effect of group on  
704 the number of outcomes obtained ( $F_{1,52}=0.002$ ,  $p=0.960$ ), nor a significant interaction  
705 between group and programmed contingency ( $F_{4,208}=1.158$ ,  $p=0.330$ ). These findings  
706 therefore rule out the possibilities that OCD patients' behavior resulted in better outcomes  
707 overall or that OCD patients' behavior was secondary to differences in reward rate. In  
708 addition, we used the BIS/BAS (Behavioral Inhibition System/Behavioral Approach System)  
709 questionnaire to measure reward responsiveness via the BAS reward responsiveness  
710 subscale [51]. Although data were available only for a subset of subjects (18 controls and 19  
711 OCD) there was no group difference in reward responsiveness ( $t_{35}=0.375$ ,  $p=0.710$ ). There

712 was no difference in response rate at the maximal contingency (Figure 3A, at  $\Delta P=0.6$ ), but  
713 specifically for certain levels of contingency suggesting that the effect was due to reasons  
714 other than reward responsiveness.

715

716 **Data Processing and Analysis.** All statistical tests were two-sided, and parametric or  
717 nonparametric tests applied as needed according to assumptions of the specific statistical  
718 test chosen. We analyzed performance in terms of response rate and causality judgements  
719 for different levels of instrumental contingency.

720 We adopted a two-step approach. Firstly, we identified if there was a difference between  
721 controls and patients in behavioral sensitivity to instrumental contingency. To this end we  
722 computed a response rate, obtained by dividing the number of responses by the number of  
723 bins for each block. For each dependent variable (response rate and causality judgement)  
724 programmed contingency was used as a within-subject factor and group as a between-  
725 subject factor (**Figures 3A, 3B and 5A**). Data were collapsed across blocks having equal  
726 programmed contingencies. Analyses were performed in R version 3.3.1 ([http://www.r-](http://www.r-project.org/)  
727 [project.org/](http://www.r-project.org/)) using the 'ez' package for ANOVA. Levene's test was used to verify  
728 homogeneity of variance. Mauchly's test of sphericity was applied and Greenhouse–Geisser  
729 and Huynh–Feldt correction used for substantial ( $\epsilon < 0.75$ ) and minimal violation ( $\epsilon \geq 0.75$ ),  
730 respectively. To investigate the relationship between contingency judgments and response  
731 rate between groups, we used linear mixed-effects models (**Figure 3C**). Group was used as  
732 a fixed-effect factor; linear (and, where applicable, quadratic) causality judgments were used  
733 as continuous fixed-effect predictors. The maximal random effect structure justified by the  
734 design was specified [52] using mixed models [53].

735 Secondly, we tested specifically if behavior was habitual for those conditions in which we  
736 observed diminished sensitivity to instrumental contingency was observed in OCD patients  
737 and in which  $P(O|A)$  was stable and  $P(O|-A)$  was increased. Accordingly, we obtained a ratio  
738 score by considering pairs of contingent and corresponding degraded blocks [17]: for each  
739 pair, the number of responses in the contingent block was divided by the sum of responses

740 in both the contingent and degraded blocks. Thus the ratio score represents the number of  
741 responses in the contingent condition as a proportion of the total responses made across  
742 both contingent and degraded condition, with values close to 1 indicating high sensitivity to  
743 contingency and values close to 0.5 indicating habitual behavior. Homogeneity of variance  
744 across groups was verified via Levene's test and Student's t-test applied accordingly  
745 (**Figures 4A-4C**). Data collection and analysis were not performed blind to the conditions of  
746 the experiment.  
747

748 **ACKNOWLEDGMENTS**

749 We thank all the patients and volunteers who took part in this study. We thank Anthony  
750 Dickinson and Simon White for their advice. This research was funded by a Wellcome Trust  
751 Senior Investigator Award (104631/Z/14/Z) to T.W. Robbins. Work was completed at the  
752 Behavioural and Clinical Neuroscience Institute, University of Cambridge, Cambridge, UK,  
753 supported by a joint award from the Medical Research Council and Wellcome Trust  
754 (G00001354). M.M. Vaghi is supported by a Pinsent Darwin Scholarship in Mental Pathology  
755 and Angharad Dodds John Bursary in Mental Health and Neuropsychiatry. The work was  
756 previously presented in part at Society for Neuroscience, San Diego, CA, 2016.

757 **COMPETING INTERESTS**

758 MMV reports no biomedical financial interests or potential conflicts of interest. RNC receives  
759 royalty income for behavioral research control software (not used in this study) and for books  
760 (not cited in this study). AMA-S reports no biomedical financial interests or potential conflicts  
761 of interest. NAF reports no biomedical financial interests or potential conflicts of interest. AS  
762 reports no biomedical financial interests or potential conflicts of interest. TWR reports no  
763 biomedical financial interests or potential conflicts of interest.

764

765

766 **REFERENCES**

- 767 [1] Dickinson A, Balleine B. Motivational control of goal-directed action. *Anim Learn Behav*  
768 1994;22:1–18. doi:10.3758/BF03199951.
- 769 [2] Everitt BJ, Robbins TW. Neural systems of reinforcement for drug addiction: from actions  
770 to habits to compulsion. *Nat Neurosci* 2005;8:1481–9. doi:10.1038/nn1579.
- 771 [3] Robbins T, Gillan CM, Smith DG, de Wit S, Ersche KD. Neurocognitive endophenotypes  
772 of impulsivity and compulsivity: towards dimensional psychiatry. *Trends Cogn Sci*  
773 2012;16:81–91. doi:10.1016/j.tics.2011.11.009.
- 774 [4] Denys D. Obsessionality & compulsivity: a phenomenology of obsessive-compulsive  
775 disorder. *Philos Ethics Humanit Med* 2011;6:3. doi:10.1186/1747-5341-6-3.
- 776 [5] Kozak MJ, Foa EB. Obsessions, overvalued ideas, and delusions in obsessive-  
777 compulsive disorder. *Behav Res Ther* 1994;32:343–53. doi:10.1016/0005-  
778 7967(94)90132-5.
- 779 [6] Rachman SJ, Hodgson RJ. Obsessions and compulsions. Prentice Hall; 1980.
- 780 [7] Salkovskis PM. Obsessional-compulsive problems: a cognitive-behavioural analysis.  
781 *Behav Res Ther* 1985;23:571–83. doi:10.1016/0005-7967(85)90105-6.
- 782 [8] Steketee G, Frost RO, Cohen I. Beliefs in Obsessive-Compulsive Disorder. *J Anxiety*  
783 *Disord* 1998;12:525–37. doi:10.1016/S0887-6185(98)00030-9.
- 784 [9] Gillan CM, Pappmeyer M, Morein-Zamir S, Sahakian BJ, Fineberg NA, Robbins TW, et al.  
785 Disruption in the balance between goal-directed behavior and habit learning in  
786 obsessive-compulsive disorder. *Am J Psychiatry* 2011;168:718–26.  
787 doi:10.1176/appi.ajp.2011.10071062.
- 788 [10] Gillan CM, Apergis-Schoute AM, Morein-Zamir S, Urcelay GP, Sule A, Fineberg NA, et  
789 al. Functional neuroimaging of avoidance habits in obsessive-compulsive disorder. *Am*  
790 *J Psychiatry* 2015;172:284–93. doi:10.1176/appi.ajp.2014.14040525.
- 791 [11] Gillan CM, Morein-Zamir S, Urcelay GP, Sule A, Voon V, Apergis-Schoute AM, et al.  
792 Enhanced avoidance habits in obsessive-compulsive disorder. *Biol Psychiatry*  
793 2014;75:631–8. doi:10.1016/j.biopsych.2013.02.002.
- 794 [12] Hammond LJ. The effect of contingency upon the appetitive conditioning of free-operant  
795 behavior. *J Exp Anal Behav* 1980;34:297–304. doi:10.1901/jeab.1980.34-297.
- 796 [13] Balleine BW, Dickinson A. Goal-directed instrumental action: contingency and incentive  
797 learning and their cortical substrates. *Neuropharmacology* 1998;37:407–19.
- 798 [14] Chatlosh DL, Neunaber DJ, Wasserman EA. Response-outcome contingency:  
799 Behavioral and judgmental effects of appetitive and aversive outcomes with college  
800 students. *Learn Motiv* 1985;16:1–34. doi:10.1016/0023-9690(85)90002-5.
- 801 [15] Dickinson A, Charnock DJ. Contingency effects with maintained instrumental  
802 reinforcement. *Q J Exp Psychol Sect B* 1985;37:397–416.  
803 doi:10.1080/14640748508401177.
- 804 [16] Gourley SL, Olevska A, Zimmermann KS, Ressler KJ, DiLeone RJ, Taylor JR. The  
805 orbitofrontal cortex regulates outcome-based decision-making via the lateral striatum.  
806 *Eur J Neurosci* 2013;38:2382–8. doi:10.1111/ejn.12239.
- 807 [17] Jackson SAW, Horst NK, Pears A, Robbins TW, Roberts AC. Role of the perigenual  
808 anterior cingulate and orbitofrontal cortex in contingency learning in the marmoset.  
809 *Cereb Cortex* 2016;26:3273–84. doi:10.1093/cercor/bhw067.
- 810 [18] Liljeholm M, Tricomi E, O'Doherty JP, Balleine BW. Neural correlates of instrumental  
811 contingency learning: differential effects of action–reward conjunction and disjunction. *J*  
812 *Neurosci* 2011;31:2474–80. doi:10.1523/JNEUROSCI.3354-10.2011.
- 813 [19] Shanks DR, Dickinson A. Instrumental judgment and performance under variations in  
814 action–outcome contingency and contiguity. *Mem Cognit* 1991;19:353–60.  
815 doi:10.3758/BF03197139.
- 816 [20] Tanaka SC, Balleine BW, O'Doherty JP. Calculating consequences: brain systems that  
817 encode the causal effects of actions. *J Neurosci* 2008;28:6750–5.  
818 doi:10.1523/JNEUROSCI.1808-08.2008.

- 819 [21]Saxena S, Rauch SL. Functional neuroimaging and the neuroanatomy of obsessive-  
820 compulsive disorder. *Psychiatr Clin North Am* 2000;23:563–586.
- 821 [22]Sjoerds Z, de Wit S, van den Brink W, Robbins TW, Beekman ATF, Penninx BWJH, et  
822 al. Behavioral and neuroimaging evidence for overreliance on habit learning in alcohol-  
823 dependent patients. *Transl Psychiatry* 2013;3:e337. doi:10.1038/tp.2013.107.
- 824 [23]Voon V, Derbyshire K, Rück C, Irvine MA, Worbe Y, Enander J, et al. Disorders of  
825 compulsivity: a common bias towards learning habits. *Mol Psychiatry* 2015;20:345–52.  
826 doi:10.1038/mp.2014.44.
- 827 [24]Frost RO, Sher KJ, Geen T. Psychopathology and personality characteristics of  
828 nonclinical compulsive checkers. *Behav Res Ther* 1986;24:133–43. doi:10.1016/0005-  
829 7967(86)90084-7.
- 830 [25]Frost RO, Krause MS, McMahon MJ, Peppe J, Evans M, McPhee AE, et al. Compulsivity  
831 and superstitiousness. *Behav Res Ther* 1993;31:423–5. doi:10.1016/0005-  
832 7967(93)90101-Y.
- 833 [26]Reuven-Magril O, Dar R, Liberman N. Illusion of control and behavioral control attempts  
834 in obsessive-compulsive disorder. *J Abnorm Psychol* 2008;117:334–41.  
835 doi:10.1037/0021-843X.117.2.334.
- 836 [27]Allan LG. A note on measurement of contingency between two binary variables in  
837 judgment tasks. *Bull Psychon Soc* 1980;15:147–9. doi:10.3758/BF03334492.
- 838 [28]Patton JH, Stanford MS, Barratt ES. Factor structure of the barratt impulsiveness scale.  
839 *J Clin Psychol* 1995;51:768–74. doi:10.1002/1097-4679(199511)51:6<768::AID-  
840 JCLP2270510607>3.0.CO;2-1.
- 841 [29]Cardinal RN, Aitken MRF. ANOVA for the Behavioral Sciences Researcher. Psychology  
842 Press; 2013.
- 843 [30]Dickinson A. Actions and habits: the development of behavioural autonomy. *Philos Trans*  
844 *R Soc Lond B Biol Sci* 1985;308:67–78. doi:10.1098/rstb.1985.0010.
- 845 [31]Alloy LB, Abramson LY. Judgment of contingency in depressed and nondepressed  
846 students: sadder but wiser? *J Exp Psychol Gen* 1979;108:441–85.
- 847 [32]Yin HH, Knowlton BJ, Balleine BW. Blockade of NMDA receptors in the dorsomedial  
848 striatum prevents action-outcome learning in instrumental conditioning. *Eur J Neurosci*  
849 2005;22:505–12. doi:10.1111/j.1460-9568.2005.04219.x.
- 850 [33]Tricomi EM, Delgado MR, Fiez JA. Modulation of caudate activity by action contingency.  
851 *Neuron* 2004;41:281–92. doi:10.1016/S0896-6273(03)00848-1.
- 852 [34]Bradfield LA, Dezfouli A, van Holstein M, Chieng B, Balleine BW. Medial Orbitofrontal  
853 Cortex Mediates Outcome Retrieval in Partially Observable Task Situations. *Neuron*  
854 2015;88:1268–80. doi:10.1016/j.neuron.2015.10.044.
- 855 [35]Menzies L, Chamberlain SR, Laird AR, Thelen SM, Sahakian BJ, Bullmore ET.  
856 Integrating evidence from neuroimaging and neuropsychological studies of obsessive-  
857 compulsive disorder: The orbitofronto-striatal model revisited. *Neurosci Biobehav Rev*  
858 2008;32:525–49. doi:10.1016/j.neubiorev.2007.09.005.
- 859 [36]Harrison BJ, Pujol J, Cardoner N, Deus J, Alonso P, López-Solà M, et al. Brain  
860 corticostriatal systems and the major clinical symptom dimensions of obsessive-  
861 compulsive disorder. *Biol Psychiatry* 2013;73:321–8.  
862 doi:10.1016/j.biopsych.2012.10.006.
- 863 [37]Vaghi MM, Vértes PE, Kitzbichler MG, Apergis-Schoute AM, van der Flier FE, Fineberg  
864 NA, et al. Specific Frontostriatal Circuits for Impaired Cognitive Flexibility and Goal-  
865 Directed Planning in Obsessive-Compulsive Disorder: Evidence From Resting-State  
866 Functional Connectivity. *Biol Psychiatry* 2017;81:708–17.  
867 doi:10.1016/j.biopsych.2016.08.009.
- 868 [38]Shafran R, Thordarson DS, Rachman S. Thought-action fusion in obsessive compulsive  
869 disorder. *J Anxiety Disord* 1996;10:379–91. doi:10.1016/0887-6185(96)00018-7.
- 870 [39]Gillan CM, Robbins TW. Goal-directed learning and obsessive-compulsive disorder. *Phil*  
871 *Trans R Soc B* 2014;369:20130475. doi:10.1098/rstb.2013.0475.
- 872 [40]Robbins TW, Costa RM. Habits. *Curr Biol* 2017;27:R1200–6.  
873 doi:10.1016/j.cub.2017.09.060.



- 874 [41]Worbe Y, Savulich G, Voon V, Fernandez-Egea E, Robbins TW. Serotonin depletion  
875 induces “waiting impulsivity” on the human four-choice serial reaction time task: cross-  
876 species translational significance. *Neuropsychopharmacology* 2014.  
877 doi:10.1038/npp.2013.351.
- 878 [42]Sheehan DV, Lecrubier Y, Sheehan KH, Amorim P, Janavs J, Weiller E, et al. The Mini-  
879 International Neuropsychiatric Interview (M.I.N.I.): the development and validation of a  
880 structured diagnostic psychiatric interview for DSM-IV and ICD-10. *J Clin Psychiatry*  
881 1998;59 Suppl 20:22-33-57.
- 882 [43]Goodman WK, Price LH, Rasmussen SA, Mazure C, Fleischmann RL, Hill CL, et al. The  
883 Yale-Brown Obsessive Compulsive Scale. I. Development, use, and reliability. *Arch*  
884 *Gen Psychiatry* 1989;46:1006–11.
- 885 [44]Pertusa A, Frost RO, Fullana MA, Samuels J, Steketee G, Tolin D, et al. Refining the  
886 diagnostic boundaries of compulsive hoarding: a critical review. *Clin Psychol Rev*  
887 2010;30:371–86. doi:10.1016/j.cpr.2010.01.007.
- 888 [45]Montgomery SA, Asberg M. A new depression scale designed to be sensitive to change.  
889 *Br J Psychiatry J Ment Sci* 1979;134:382–9.
- 890 [46]Spielberger CD. Manual for the State-Trait Anxiety Inventory STAI (Form Y) (“Self-  
891 Evaluation Questionnaire”) 1983.
- 892 [47]Foa EB, Huppert JD, Leiberg S, Langner R, Kichic R, Hajcak G, et al. The obsessive-  
893 compulsive inventory: development and validation of a short version. *Psychol Assess*  
894 2002;14:485–96.
- 895 [48]Brainard DH. The Psychophysics Toolbox. *Spat Vis* 1997;10:433–6.
- 896 [49]Pelli DG. The VideoToolbox software for visual psychophysics: transforming numbers  
897 into movies. *Spat Vis* 1997;10:437–42.
- 898 [50]Kleiner M, Brainard D, Pelli D, Ingling A, Murray R, Broussard C. What’s new in  
899 psychtoolbox-3. *Perception* 2007;36:1–16.
- 900 [51]Carver, C. S., & White, T. L. Behavioral inhibition, behavioral activation, and affective  
901 responses to impending reward and punishment: The BIS/BAS Scales. *Journal of*  
902 *Personality and Social Psychology*, 1994;67:319–33.
- 903 [52]Barr DJ, Levy R, Scheepers C, Tily HJ. Random effects structure for confirmatory  
904 hypothesis testing: Keep it maximal. *J Mem Lang* 2013;68.  
905 doi:10.1016/j.jml.2012.11.001.
- 906 [53]Keppel G. Design and analysis: a researcher’s handbook. Third edition. London:  
907 Prentice-Hall; 1991.
- 908
